# Supplementary material
Source: Springer Nature journal article supplement (https://www.springermedizin.de/resource/supplementary/12916_2009_211_MOESM3_ESM.pdf/9599402)
Supplement: MOESM3 [file 9599402]

a)

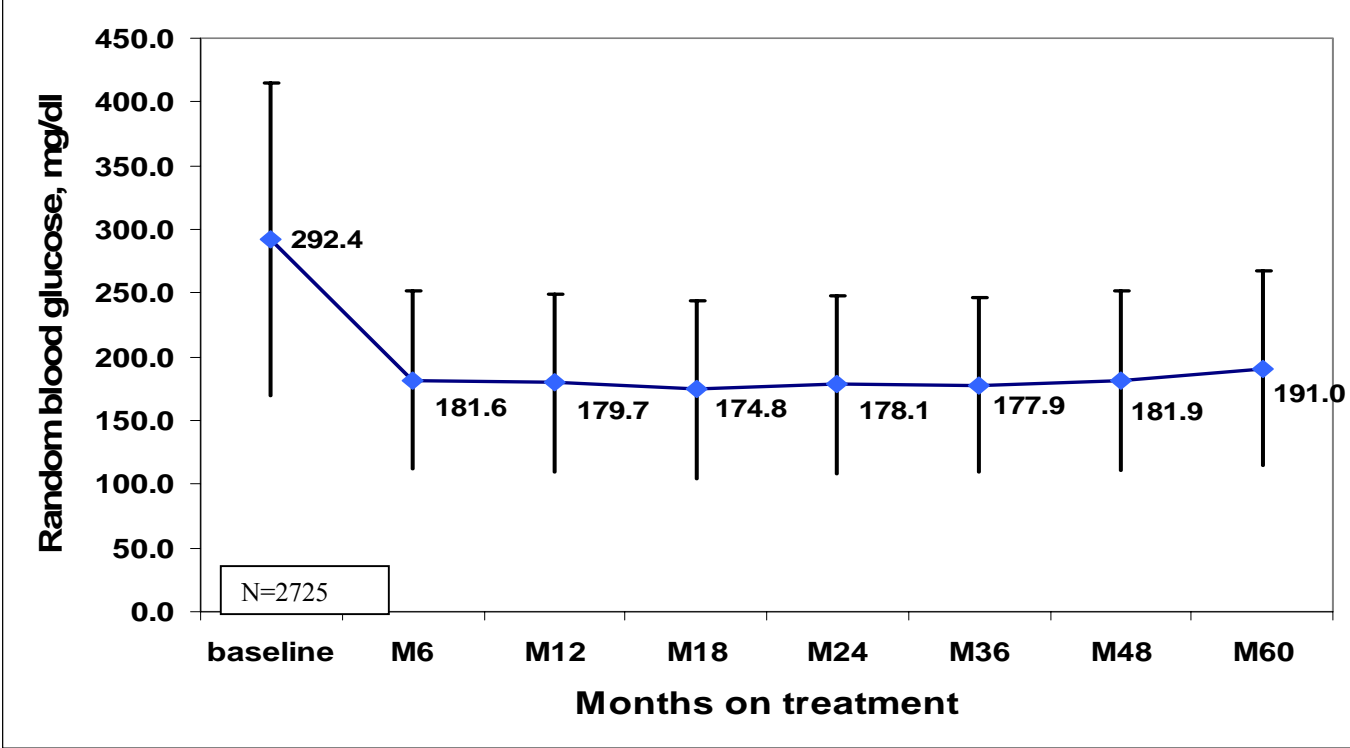

b)

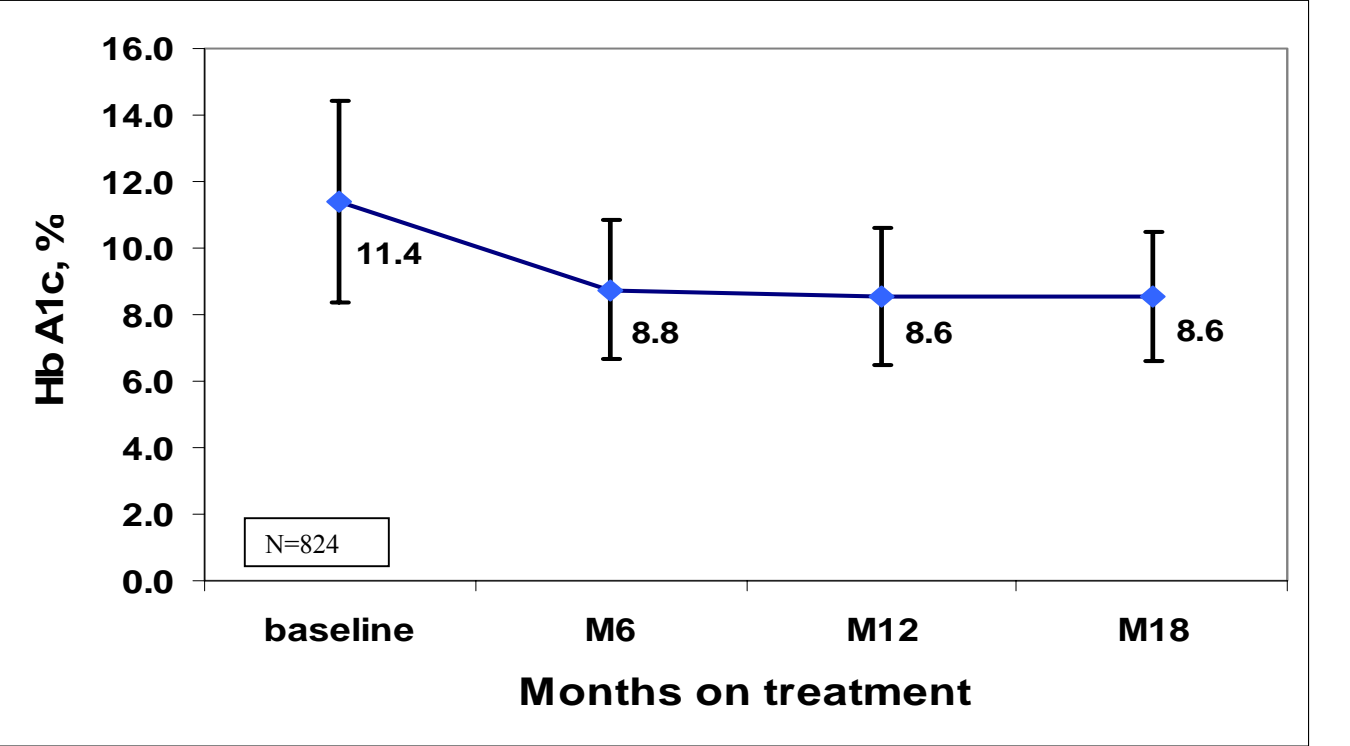

c)

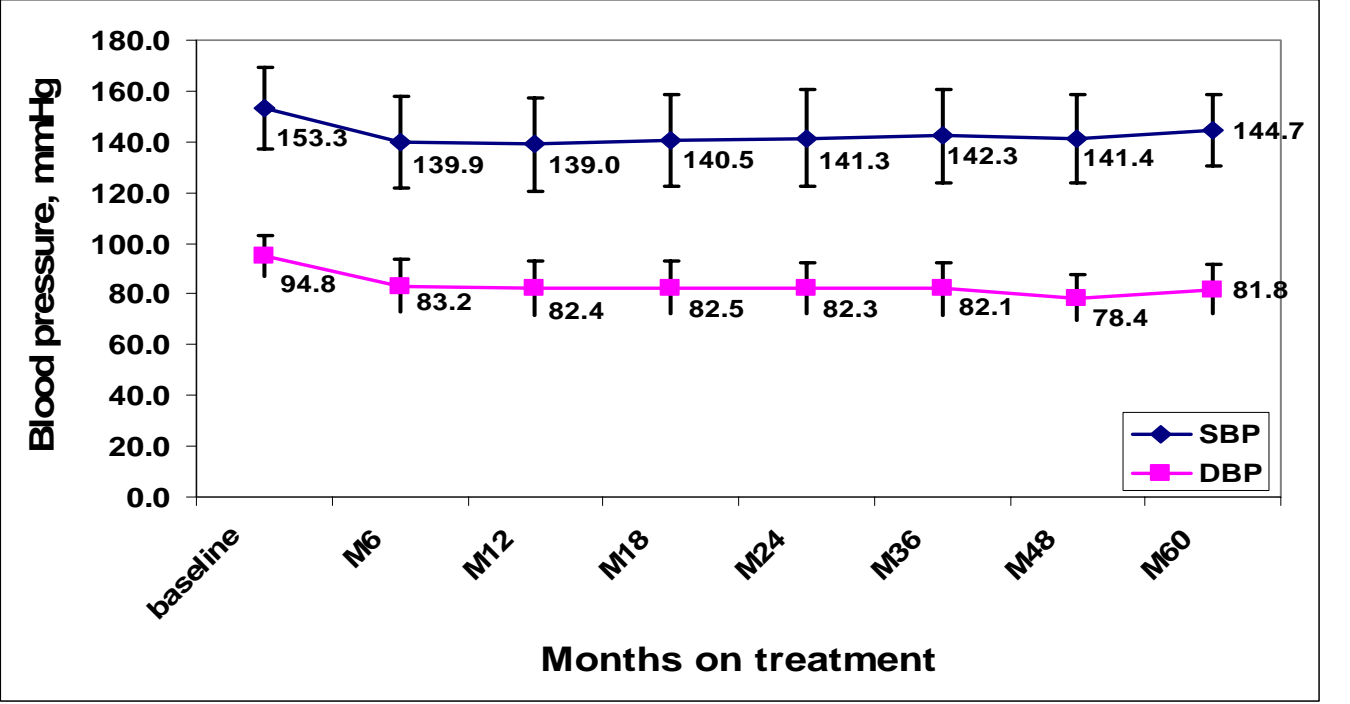

d)

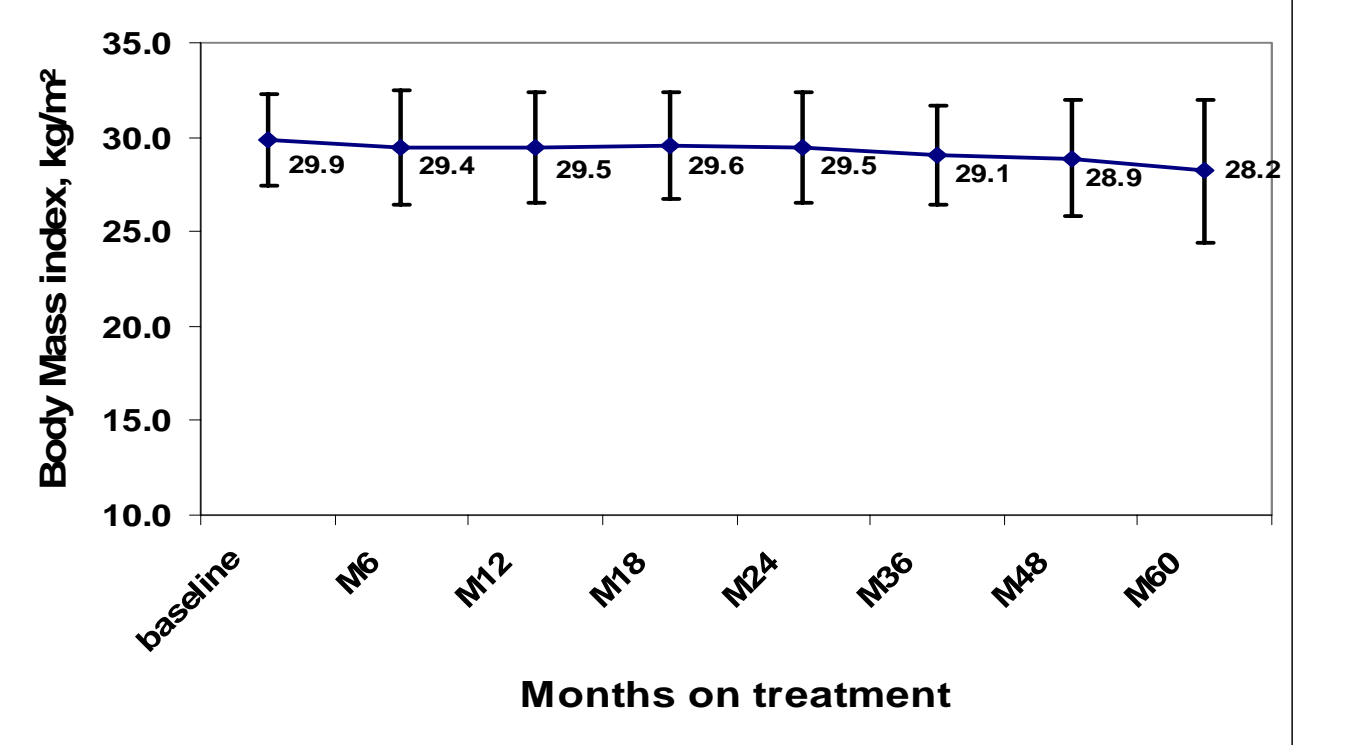

Includes only patients who were not lost to follow-up and who had baseline and follow-up values.  
Evolution of (a) random blood glucose, (b) HbA1c, (c)(d) blood pressure and (e) body mass index in diabetic patients over time. N= number of patients with baseline value.  
For BMI, only patients with elevated baseline BMI ( $\geq 23.0$ ) were included in the analysis.  
For SBP, only patients with elevated baseline SBP ( $>130$ mmHg) were included in the analysis.  
For DBP, only patients with elevated baseline DBP ( $>80$ mmHg) were included in the analysis.
